# Supplementary material for: Synthesis of binary solid solution Cu–Pd nanoparticles by DMF reduction for enhanced photoluminescence properties
Source: Royal Society of Chemistry journal article supplement (doi:10.1039/c4tc02129k), 2014-11-07
Supplement: c4tc02129k1.pdf [file c4tc02129k1.pdf]

## Supporting Information

### Synthesis of Binary Solid Solution Cu-Pd Nanoparticles by DMF Reduction for Enhanced Photoluminescent Properties

Masashi Chiba,<sup>a</sup> Mai Nguyen Thanh,<sup>a</sup> Yasuchika Hasegawa,<sup>b</sup> Yasushi Obora,<sup>c</sup> Hideya Kawasaki,<sup>c</sup> and Tetsu Yonezawa<sup>a,\*</sup>

<sup>a</sup> Division of Materials Science and Engineering, Faculty of Engineering, Hokkaido University, Kita 13 Nishi 8, Sapporo, Hokkaido 060-8628, Japan. \*E-mail: tetsu@eng.hokudai.ac.jp

<sup>b</sup> Division of Chemistry, Faculty of Engineering, Hokkaido University, Kita 13 Nishi 8, Kita-ku, Sapporo, Hokkaido 060-8628, Japan

<sup>c</sup> Department of Chemistry, Kansai University, Yamate-cho, Suita-shi, Osaka, 564-8680 Japan

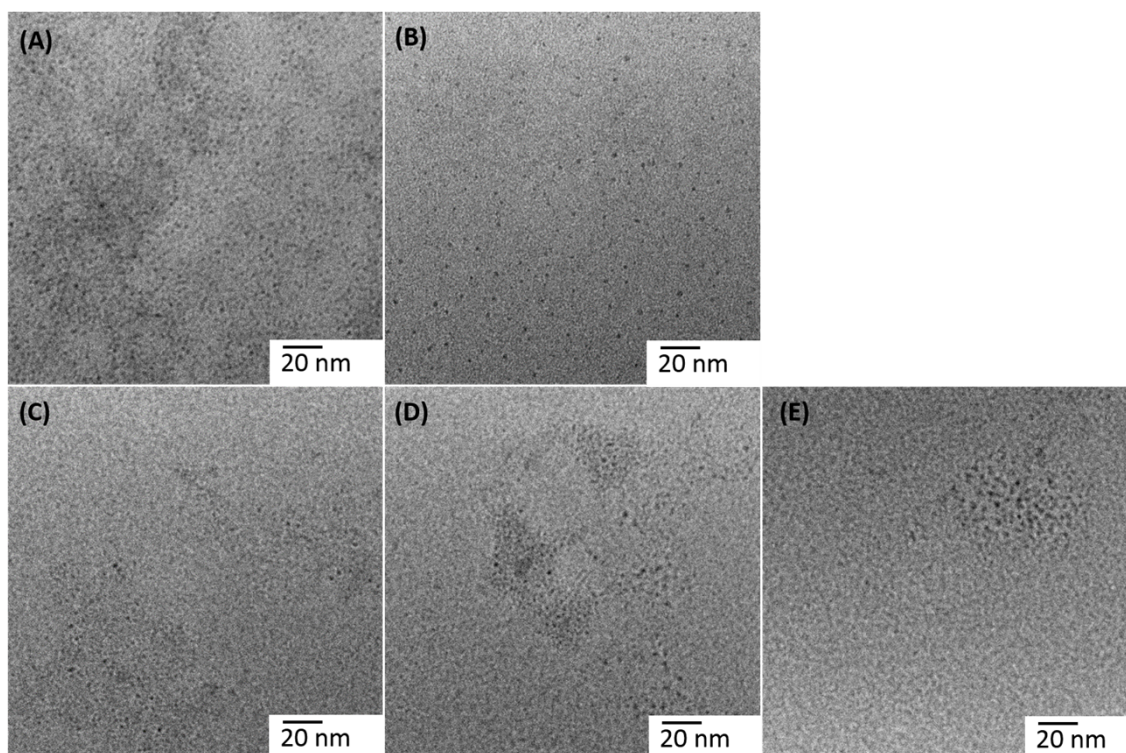

**Figure S1.** TEM images of Cu NPs (A), Pd NPs (B) and Cu-Pd NPs synthesized using equimolar feeding ratio (C-E).

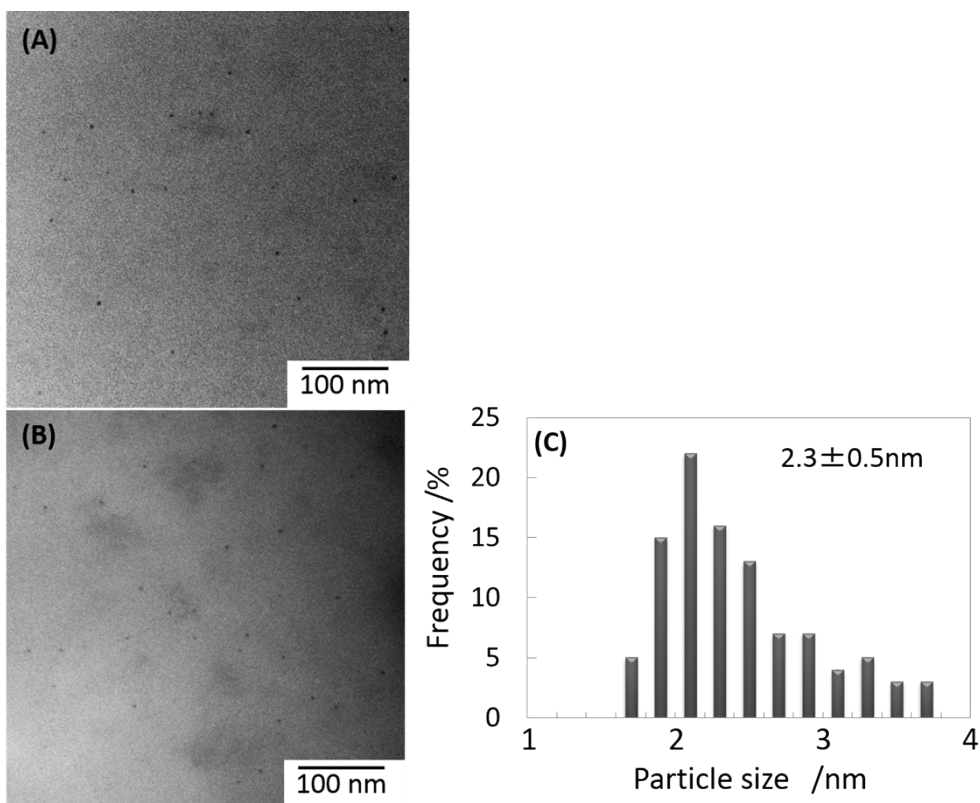

**Figure S2.** TEM image (A) and size distribution (B) of Cu<sub>90</sub>Pd<sub>10</sub> NPs.

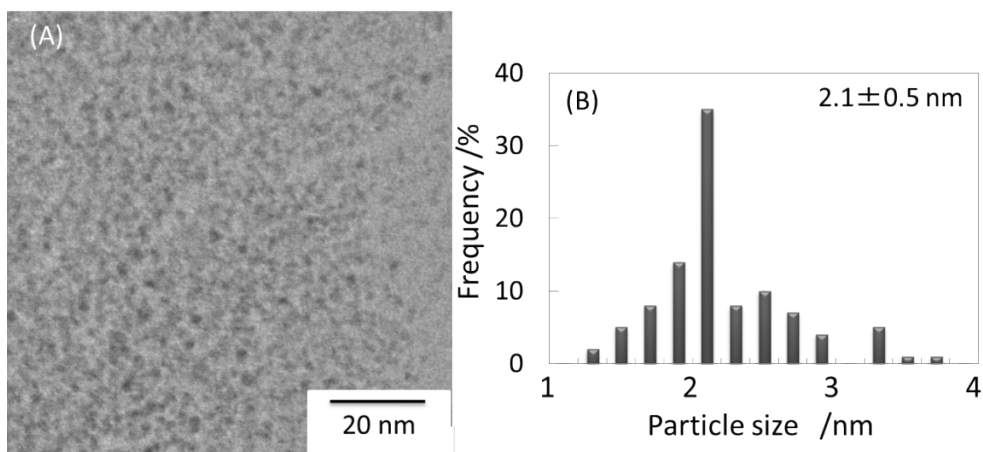

**Figure S3.** TEM image (A) and size distribution (B) of Cu<sub>75</sub>Pd<sub>25</sub> NPs.

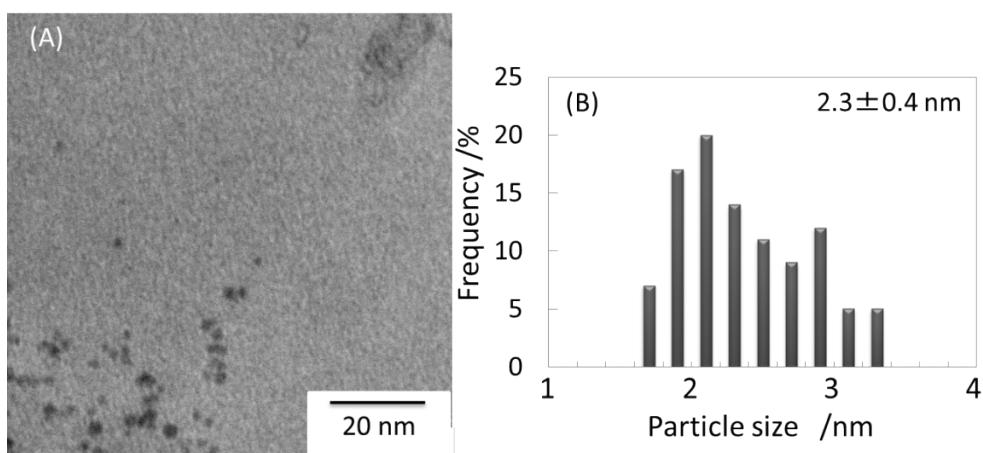

**Figure S4.** TEM image (A) and size distribution (B) of Cu<sub>25</sub>Pd<sub>75</sub> NPs.

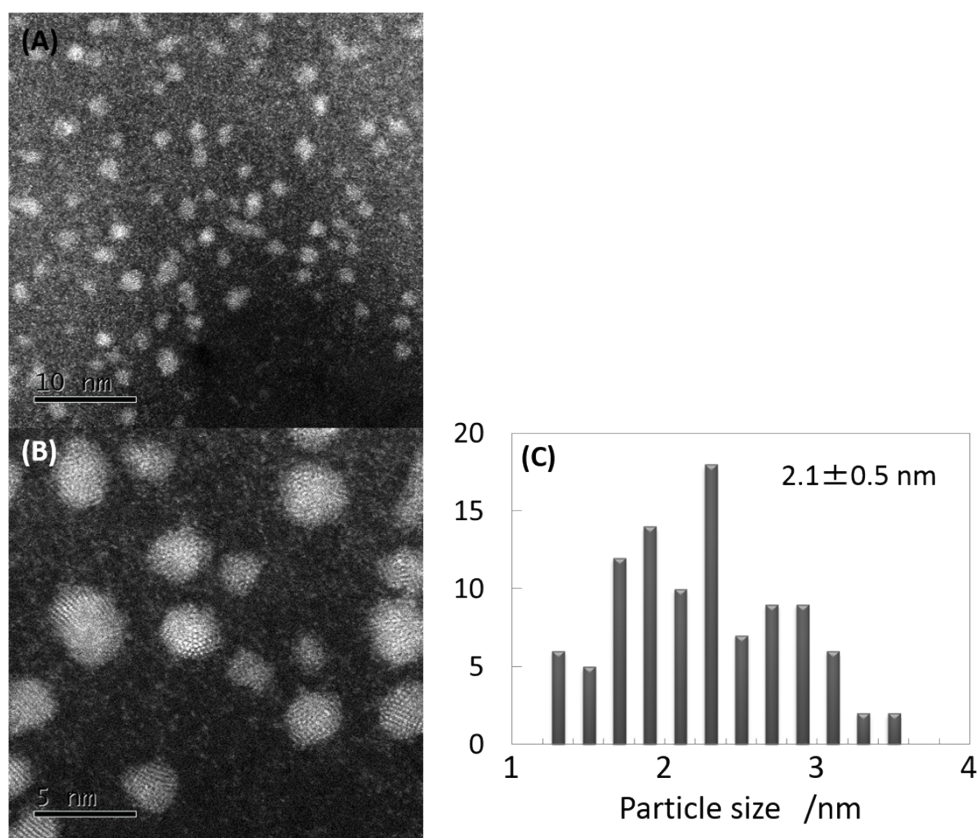

**Figure S5.** Dark-field TEM image (A) and HAADF image (B) and size distribution (C) of Cu<sub>10</sub>Pd<sub>90</sub> NPs.

XPS core level spectra of Cu 2p and Pd 3d are fitted using Gaussian-Lorentzian (G-L) mix function:

$$f(x) = \frac{I_0}{\{1 + M(x-x_0)^2 / \Gamma^2\} \exp\{(1-M) \ln 2 (x-x_0)^2 / \Gamma^2\}}$$

where  $I_0$ ,  $x_0$ ,  $x$ ,  $\Gamma$ , and  $M$  are the peak height, the peak position (binding energy), the binding energy, a parameter for the peak width, and the G-L mixing ratio, respectively.  $M = 0$  gives a pure Gaussian curve, while  $M = 1$  gives a pure Lorentzian curve.

Curve fitting parameters for Cu 2p<sub>3/2</sub> core level of Cu-Pd nanoparticles synthesized using various molar feeding ratios:

| Cu (at. %) |               | Cu100  |       | Cu 90 |       | Cu 75 |       | Cu 50   |        |
|------------|---------------|--------|-------|-------|-------|-------|-------|---------|--------|
| 2p5/2      | Peak position | 933.21 | 934.4 | 932.9 | 934.3 | 932.8 | 934.3 | 337.235 | 338.45 |
|            | FWHM          | 1.1    | 1.1   | 1.1   | 1.1   | 1     | 1.1   | 1.1     | 1.1    |
|            | $M$           | 0.3    | 0.3   | 0.3   | 0.3   | 0.3   | 0.3   | 0.96    | 0.95   |

| Cu (at. %) |               | Cu 25  |        | Cu 10  |        |
|------------|---------------|--------|--------|--------|--------|
| 2p5/2      | Peak position | 932.24 | 933.95 | 932.24 | 933.95 |
|            | FWHM          | 0.93   | 1      | 0.8    | 0.8    |
|            | $M$           | 0.3    | 0.3    | 0.3    | 0.3    |

Curve fitting parameters for Pd 3d core level of Cu-Pd nanoparticles synthesized using various molar feeding ratios:

| <b>Pd (at. %)</b>          |               | <b>Pd 100</b> |        | <b>Pd 90</b> |       |       | <b>Pd 75</b> |         |        |
|----------------------------|---------------|---------------|--------|--------------|-------|-------|--------------|---------|--------|
| 3d <sub>5/2</sub>          | Peak position | 336.12        | 337.3  | 335.8        | 336.6 | 338.1 | 336.57       | 337.235 | 338.45 |
|                            | FWHM          | 0.95          | 0.95   | 1.15         | 1.1   | 1.15  | 1.1          | 1.1     | 1.1    |
|                            | <i>M</i>      | 0.9           | 0.9    | 0.96         | 0.94  | 0.94  | 0.95         | 0.96    | 0.95   |
| 3d <sub>3/2</sub>          | Peak position | 341.25        | 342.45 | 341          | 341.8 | 343.3 | 341.77       | 342.47  | 343.65 |
|                            | FWHM          | 0.78          | 78     | 1.1          | 1.1   | 1.1   | 1.05         | 1.05    | 1.05   |
|                            | <i>M</i>      | 0.7           | 0.7    | 0.93         | 0.94  | 0.94  | 0.93         | 0.94    | 0.94   |
| Spin-orbit intensity ratio |               | 1.94          | 1.82   | 1.5          | 1.42  | 1.6   | 1.75         | 1.92    | 1.71   |
| Spin-orbit splitting       |               | 5.13          | 5.15   | 5.2          | 5.2   | 5.2   | 5.2          | 5.235   | 5.2    |

| <b>Pd (at. %)</b>          |               | <b>Pd 50</b> |        |        | <b>Pd 25</b> |       |        | <b>Pd 10</b> |       |        |
|----------------------------|---------------|--------------|--------|--------|--------------|-------|--------|--------------|-------|--------|
| 3d <sub>5/2</sub>          | Peak position | 336.3        | 337.16 | 338.5  | 336.56       | 337.3 | 338.66 | 336.55       | 337.9 | 339.2  |
|                            | FWHM          | 1.1          | 1.13   | 1.13   | 1.11         | 1.11  | 1.13   | 1.15         | 1.15  | 1.15   |
|                            | <i>M</i>      | 0.97         | 0.94   | 0.97   | 0.94         | 0.94  | 0.95   | 0.98         | 0.98  | 0.98   |
| 3d <sub>3/2</sub>          | Peak position | 341.5        | 342.36 | 343.65 | 341.75       | 342.5 | 343.79 | 341.8        | 343.1 | 344.15 |
|                            | FWHM          | 0.9          | 1.08   | 1      | 1.15         | 1.05  | 1.05   | 1.1          | 1.25  | 1.25   |
|                            | <i>M</i>      | 0.93         | 0.93   | 0.93   | 0.9          | 0.85  | 0.85   | 0.9          | 0.9   | 0.9    |
| Spin-orbit intensity ratio |               | 2            | 1.99   | 2.25   | 2.86         | 2.69  | 3.45   | 5.75         | 10    | 5.47   |
| Spin-orbit splitting       |               | 5.2          | 5.2    | 5.15   | 5.19         | 5.2   | 5.13   | 5.25         | 5.2   | 4.95   |

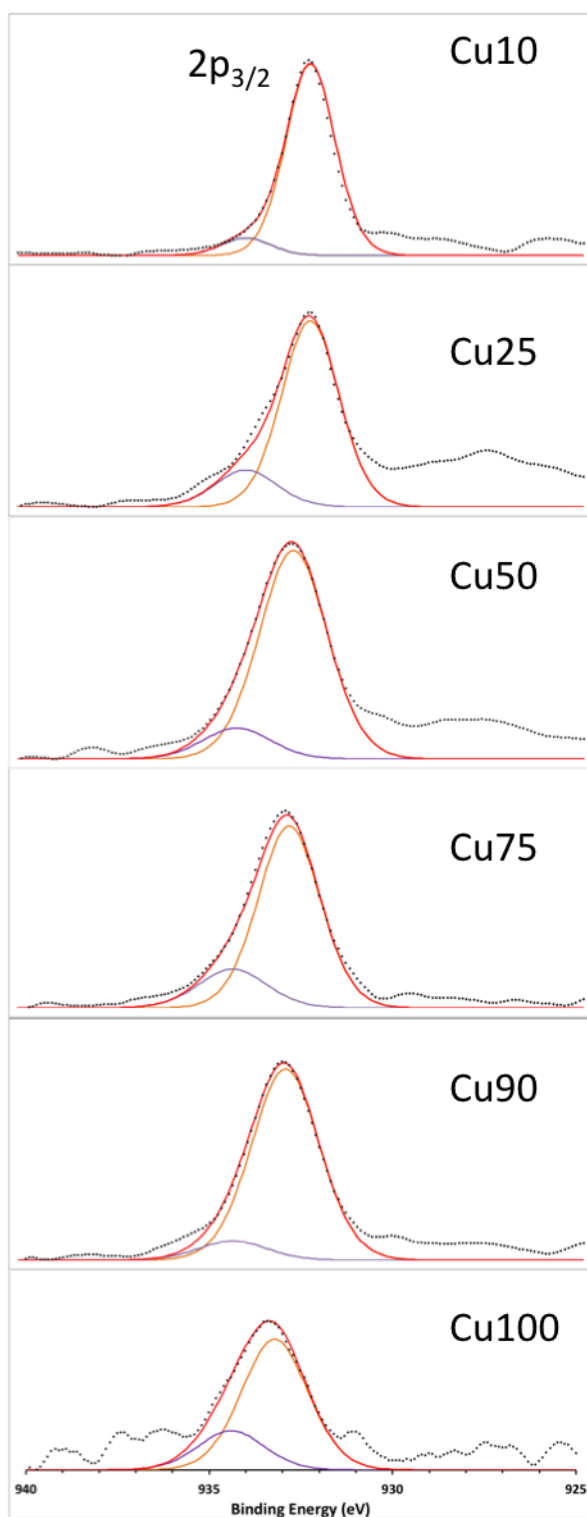

**Figure S6.** Curve fitting for XPS Cu 2p<sub>3/2</sub> core level of Cu in Cu-Pd nanoparticles synthesized using feeding ratios from 10 to 100 % of Cu precursor from the top to bottom. The red solid lines and black dotted lines are the sum spectra (of violet and orange curve) and raw spectra of Cu 2p core level.

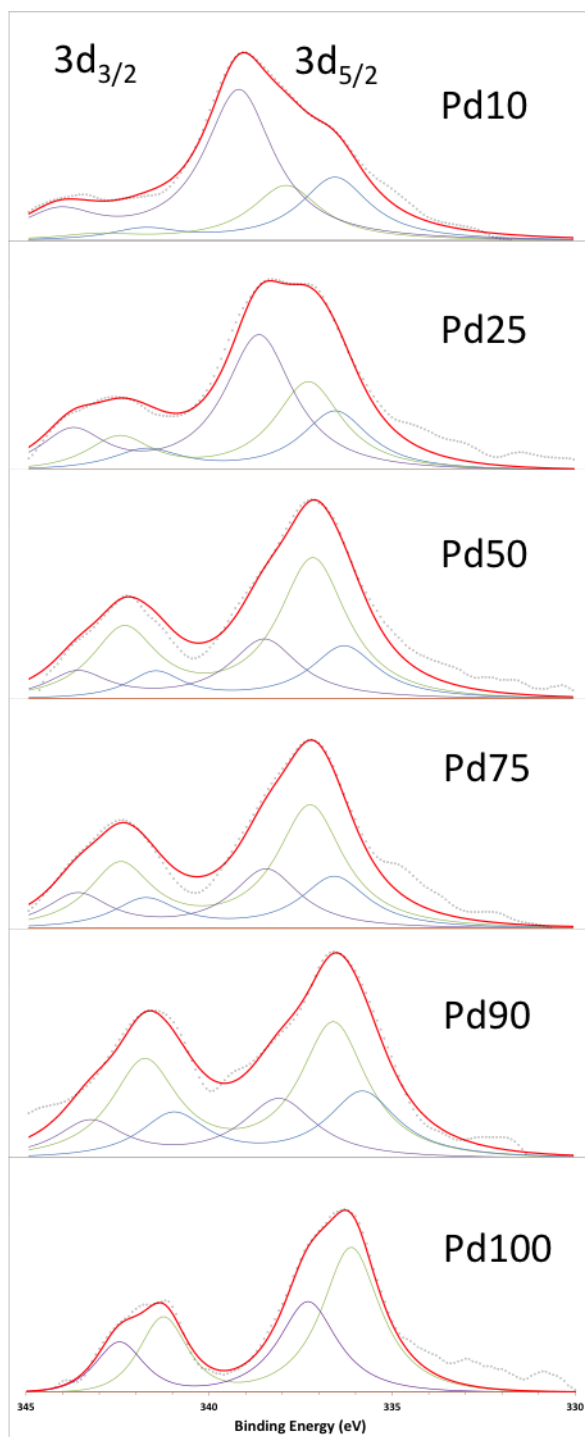

**Figure S7.** Curve fitting for XPS 3d core level of Pd in Cu-Pd nanoparticles synthesized using feeding ratios from 10 to 100 % of Pd precursor from the top to bottom. The red solid lines and black dotted lines are the sum spectra (of violet, green and blue curve) and raw spectra of Pd 3d core level.
